# Supplementary material for: Formation of hierarchically-ordered nanoporous silver foam and its electrocatalytic properties in reductive dehalogenation of organic compounds
Source: Royal Society of Chemistry journal article supplement (doi:10.1039/c8nj03460e), 2018-01-01
Supplement: c8nj03460e2.pdf [file c8nj03460e2.pdf]

**Supporting information**

**New Journal of Chemistry**

**Formation of hierarchically-ordered nanoporous silver foam and its electrocatalytic properties in reductive dehalogenation of organic compounds**

Andrey M. Mishura,<sup>†</sup> Anton S. Lytvynenko,<sup>†\*</sup> Natalia V. Grabovaya,<sup>†</sup> Konstantin S. Gavrilenko,<sup>‡,¥</sup> Alexander E. Baranchikov,<sup>§</sup> Mikhail A. Kiskin,<sup>§</sup> Sergey V. Kolotilov<sup>†</sup>

<sup>†</sup> L. V. Pisarzhevskii Institute of Physical Chemistry of the National Academy of Sciences of Ukraine, Prosp. Nauky, 31, Kyiv, 03028, Ukraine  
Tel.: +38(044)5254228; Fax: +38(044)5256216  
E-mail: anton.s.lytvynenko@gmail.com

<sup>‡</sup> Research-And-Education ChemBioCenter, National Taras Shevchenko University of Kyiv, Chervonotkackaya str., 61, Kyiv, 03022, Ukraine.  
E-mail: kgavrio@gmail.com

<sup>¥</sup> Enamine Ltd, A. Matrosova str., 23, Kyiv, 01103, Ukraine

<sup>§</sup> N. S. Kurnakov Institute of General and Inorganic Chemistry, Russian Academy of Sciences, Leninsky Prosp. 31, 119991 Moscow, GSP-1, Russian Federation  
Tel.: +7(495)9522084; Fax: +7(495)9541279  
E-mail: m\_kiskin@mail.ru

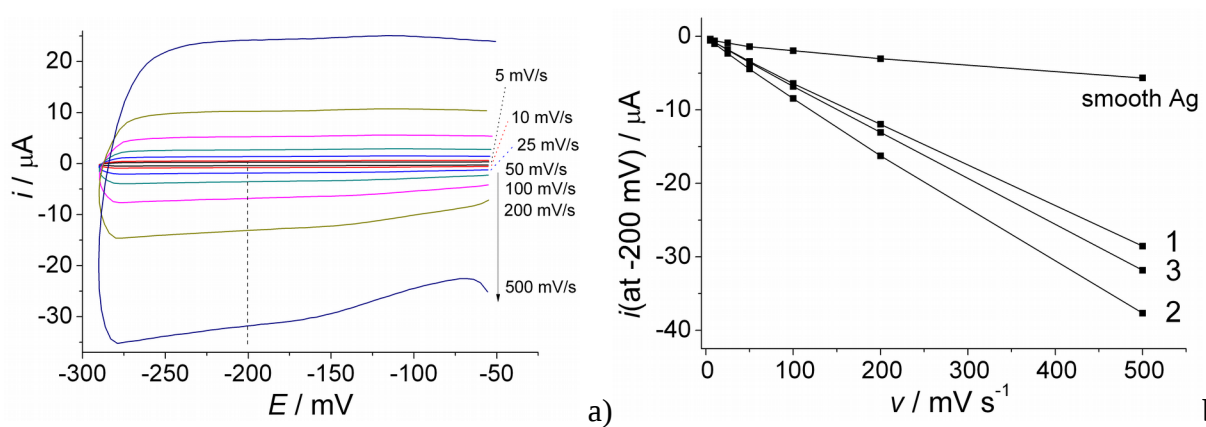

Fig. S1. Example of CVs of neat electrolyte measured on 2 mm AgNF/GC electrode at different scan rates (a) and current (at  $-200 \text{ mV}$ ) vs. scan rate dependencies for 3 AgNF/GC and a smooth silver electrode on such CVs (b). Medium:  $0.1 \text{ M Bu}_4\text{NBF}_4$  in DMF, potentials vs. Ag/AgCl reference electrode.

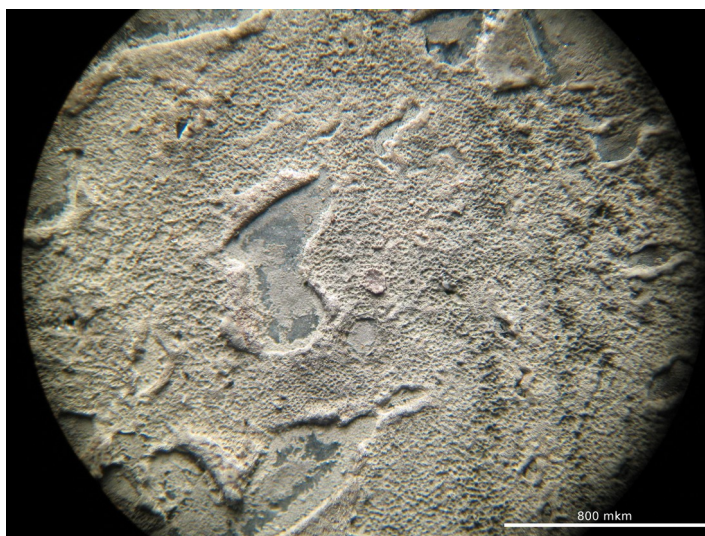

Fig. S2. AgNF/GC subjected to 6 cycles of application and dissolution of paraffin.

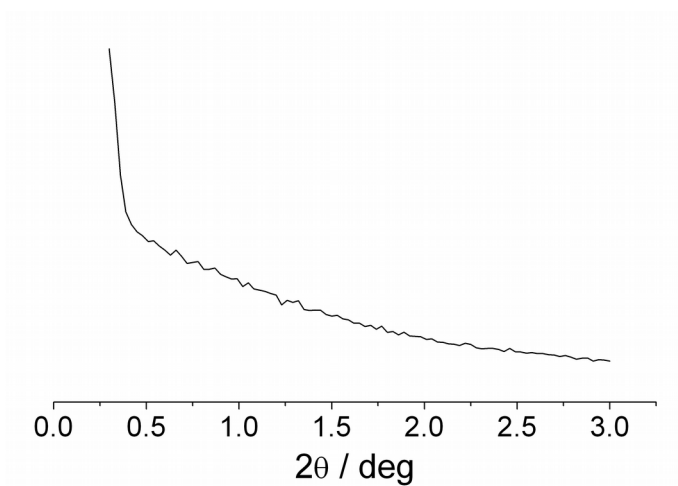

Fig. S3. Low-angle X-ray diffraction pattern of AgNF/GC.

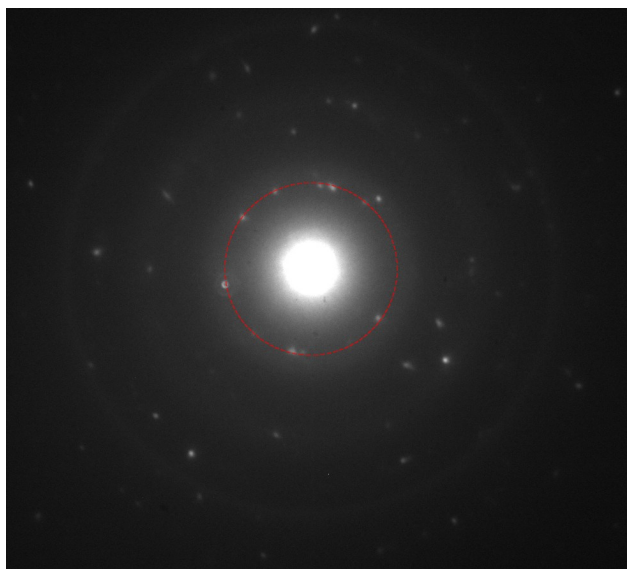

Fig. S4. Electron diffraction image of the AgNF sample with indication of the ring allegedly originated from polycrystalline silver (planes with (111) indices).

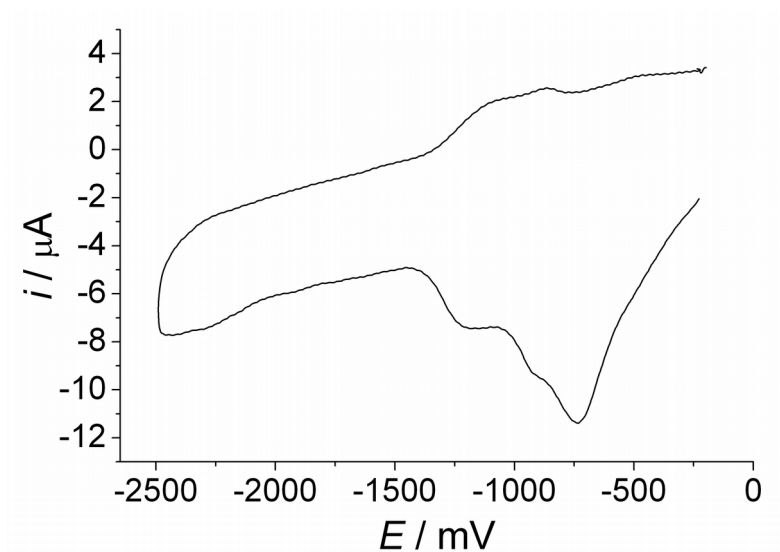

Fig. S5. An example of CV of neat electrolyte solution measured on 2 mm AgNF/GC working electrode. Medium: 0.1 M  $\text{Bu}_4\text{NBF}_4$  in DMF, scan rate – 100 mV/s, potentials vs. Ag/AgCl reference electrode.

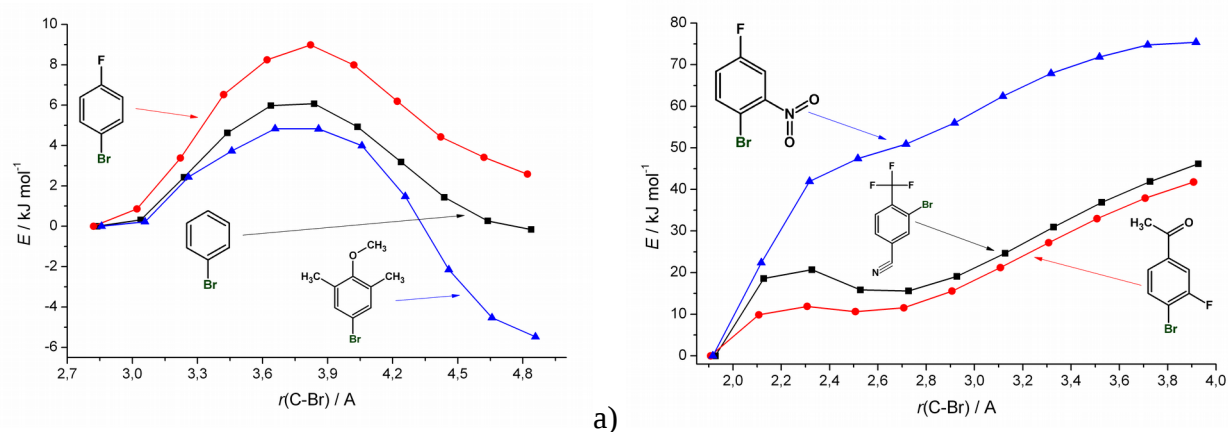

Fig. S6. Energy profiles vs. C-Br bond lengths of anion radicals of aryl bromides without (a) and with (b) functional groups that undergo electrochemical reduction.

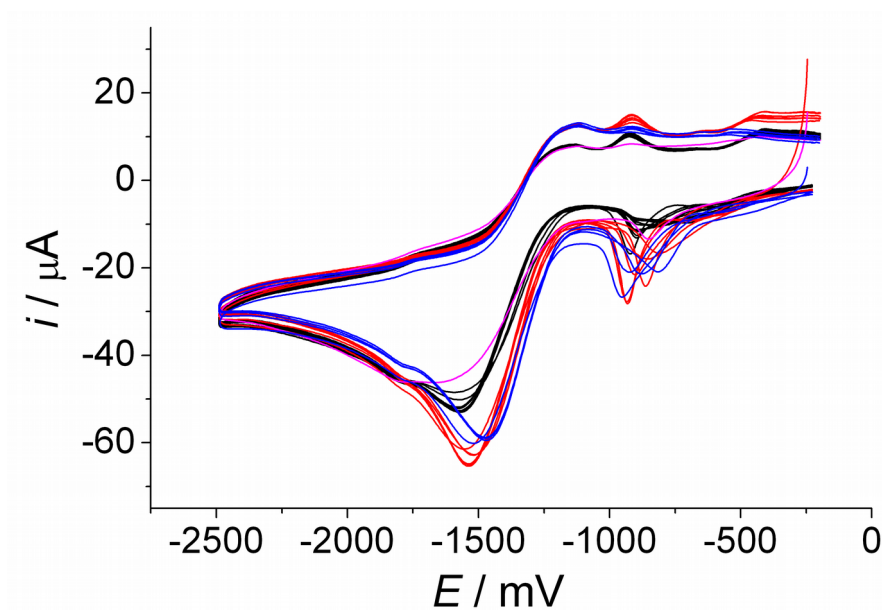

Fig. S7. Cyclic voltammograms of the solution of bromobenzene (5.6 mM) on a few different AgNF/GC samples (d = 2 mm). Different colours indicate different samples of the nanofoam, multiple curves of the same colour indicate multiple scans (the solution was stirred before each scan). Medium: 0.1 M Bu<sub>4</sub>NBF<sub>4</sub> in DMF, scan rate – 100 mV/s, potentials vs. Ag/AgCl reference electrode.

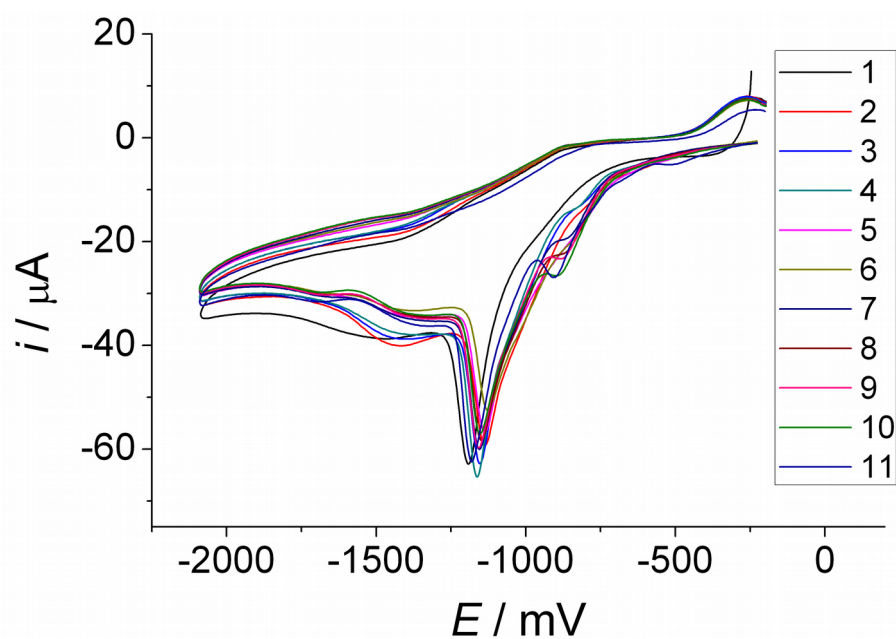

Fig. S8. Cyclic voltammograms of the solutions of halothane (5.5 mM) on AgNF/GC ( $d = 2 \text{ mm}$ ). 11 consequent scans are presented, after each one the scanning was stopped and the working solution was thoroughly stirred. Medium: 0.1 M  $\text{Bu}_4\text{NBF}_4$  in DMF, scan rate – 100 mV/s, potentials vs. Ag/AgCl reference electrode.

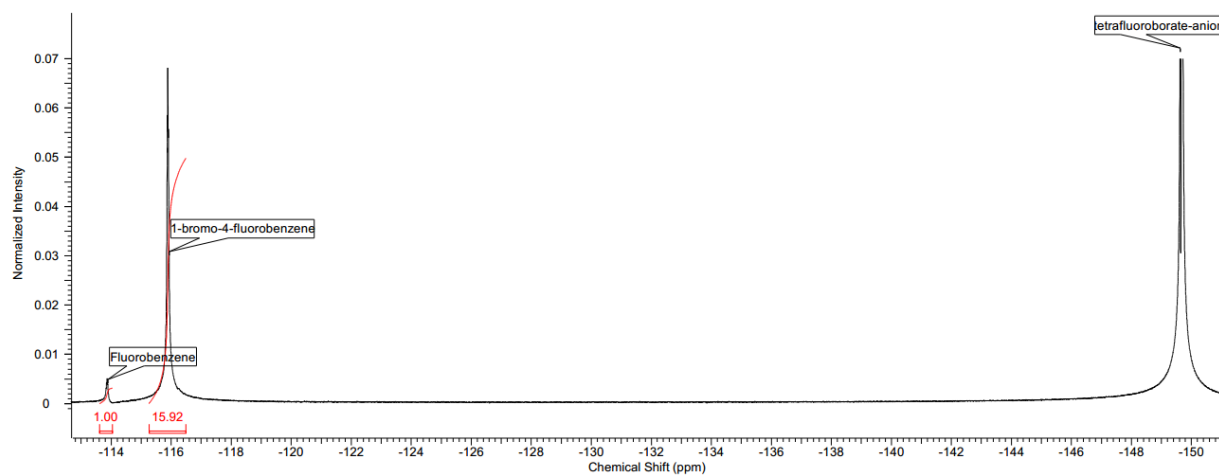

Fig S9.  $^{19}\text{F}$ -NMR spectrum of the electrolyte after electrolysis of 1-bromo-4-fluorobenzene on AgNF/GC.

**Awk script used for slight distortion of molecular geometries before DFT calculations:**

```
#!/usr/bin/awk -f

function randstep()
{
    return maxstep*rand()-maxstep/2
}
BEGIN {maxstep = 0.1; srand();}
NR <= 2 {print $0}
NR > 2 {print $1, " ", $2+randstep(), " ", $3+randstep(), " ", $4+randstep()}
```

Table S1. Equilibrium geometries of studied organic halides (neutral and reduced species) by DFT calculations and corresponding C–Br distances and bond orders.

| Formula                                                                             | Charge 0 (singlet)                                                                  | Charge –1 (doublet)                                                                  | Charge –2 (singlet)                                                                   |
|-------------------------------------------------------------------------------------|-------------------------------------------------------------------------------------|--------------------------------------------------------------------------------------|---------------------------------------------------------------------------------------|
| 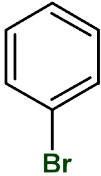   |    |    |    |
| r(C–Br), Å                                                                          | 1.912                                                                               | 2.838                                                                                | more than sum of Van der Waals radii                                                  |
| C–Br bond order                                                                     | 0.9783                                                                              | 0.2826                                                                               | –                                                                                     |
|   |   |   |   |
| r(C–Br), Å                                                                          | 1.909                                                                               | 2.821                                                                                | more than sum of Van der Waals radii                                                  |
| C–Br bond order                                                                     | 0.9827                                                                              | 0.3010                                                                               | –                                                                                     |
|  |  |  |  |
| r(C–Br), Å                                                                          | 1.915                                                                               | 2.858                                                                                | more than sum of Van der Waals radii                                                  |
| C–Br bond order                                                                     | 0.9659                                                                              | 0.2719                                                                               | –                                                                                     |

Table S1. Equilibrium geometries of studied organic halides (neutral and reduced species), by DFT calculations and corresponding C–Br distances and bond orders, *continued*

| Formula                                                                             | Charge 0 (singlet)                                                                  | Charge –1 (doublet)                                                                  | Charge –2 (singlet)                                                                   |
|-------------------------------------------------------------------------------------|-------------------------------------------------------------------------------------|--------------------------------------------------------------------------------------|---------------------------------------------------------------------------------------|
| 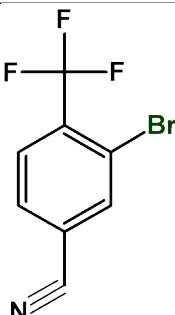   |    |    |    |
| r(C–Br), Å                                                                          | 1.901                                                                               | 1.927                                                                                | more than sum of Van der Waals radii                                                  |
| C–Br bond order                                                                     | 1.0528                                                                              | 0.9785                                                                               | –                                                                                     |
|   |   |   |   |
| r(C–Br), Å                                                                          | 1.892                                                                               | 1.907                                                                                | more than sum of Van der Waals radii                                                  |
| C–Br bond order                                                                     | 1.0210                                                                              | 0.9563                                                                               | –                                                                                     |
|  |  |  |  |
| r(C–Br), Å                                                                          | 1.895                                                                               | 1.917                                                                                | 1.940                                                                                 |
| C–Br bond order                                                                     | 1.0475                                                                              | 0.9902                                                                               | 0.9264                                                                                |
